# Supplementary material for: “Benifuuki” Extract Reduces Serum Levels of Lectin-Like Oxidized Low-Density Lipoprotein Receptor-1 Ligands Containing Apolipoprotein B: A Double-Blind Placebo-Controlled Randomized Trial
Source: Nutrients. 2018 Jul 19;10(7):924. doi: 10.3390/nu10070924 (PMC6073342; doi:10.3390/nu10070924)
Supplement: Supplementary file 1 [file nutrients-10-00924-s001.pdf]

**Table S1.** The analysis of correlation between Lipid parameters and LAB at 12 weeks.

|                                                                        | the Spearman's rank correlation coefficient test <sup>a</sup> |         |
|------------------------------------------------------------------------|---------------------------------------------------------------|---------|
|                                                                        | ρ-value                                                       | p-value |
| <b>between the Δ value of total cholesterol and the Δ value of LAB</b> |                                                               |         |
| All groups                                                             | -0.0160                                                       | 0.8465  |
| Group H                                                                | 0.0536                                                        | 0.7119  |
| Group L                                                                | -0.1134                                                       | 0.4329  |
| Group C                                                                | 0.1262                                                        | 0.3877  |
| <b>between the Δ value of triglycerides and the Δ value of LAB</b>     |                                                               |         |
| All groups                                                             | 0.1838                                                        | 0.0249* |
| Group H                                                                | 0.0972                                                        | 0.5018  |
| Group L                                                                | 0.0579                                                        | 0.6897  |
| Group C                                                                | 0.3442                                                        | 0.0154* |
| <b>between the Δ value of HDL and the Δ value of LAB</b>               |                                                               |         |
| All groups                                                             | 0.0579                                                        | 0.4828  |
| Group H                                                                | 0.0601                                                        | 0.6782  |
| Group L                                                                | 0.0408                                                        | 0.7783  |
| Group C                                                                | -0.0445                                                       | 0.7612  |
| <b>between the Δ value of LDL and the Δ value of LAB</b>               |                                                               |         |
| All groups                                                             | -0.1356                                                       | 0.3479  |
| Group H                                                                | 0.0481                                                        | 0.7400  |
| Group L                                                                | -0.1356                                                       | 0.3479  |
| Group C                                                                | 0.0828                                                        | 0.5719  |

a : the Spearman's rank correlation coefficient test analyzed the statistical difference of the Δ value at 12 weeks. (\*p<0.05, \*\*p<0.01, \*\*\*p<0.001, \*\*\*\*p<0.0001) .
